# Supplementary material for: Graphene-encapsulated selenium@polyaniline nanowires with three-dimensional hierarchical architecture for high-capacity aluminum–selenium batteries
Source: Royal Society of Chemistry journal article supplement (doi:10.1039/d2ta04210j), 2022-01-01
Supplement: d2ta04210j1.pdf [file d2ta04210j1.pdf]

Supplementary Information

**Graphene-encapsulated selenium@polyaniline nanowires  
with three-dimensional hierarchical architecture for high-  
capacity aluminum-selenium batteries**

Haiping Lei,<sup>a</sup> Jiguo Tu,<sup>\*b</sup> Suqin Li,<sup>a</sup> Zheng Huang,<sup>b</sup> Yiwa Luo,<sup>a</sup> Zhijing Yu,<sup>a</sup> Shuqiang Jiao<sup>\*a,b</sup>

<sup>a</sup> School of Metallurgical and Ecological Engineering, University of Science and Technology  
Beijing, Beijing 100083, PR China.

<sup>b</sup> State Key Laboratory of Advanced Metallurgy, University of Science and Technology  
Beijing, Beijing 100083, PR China.

**Corresponding authors:**

\*E-mail addresses: sjiao@ustb.edu.cn (S. Jiao) guo15@126.com (J. Tu).

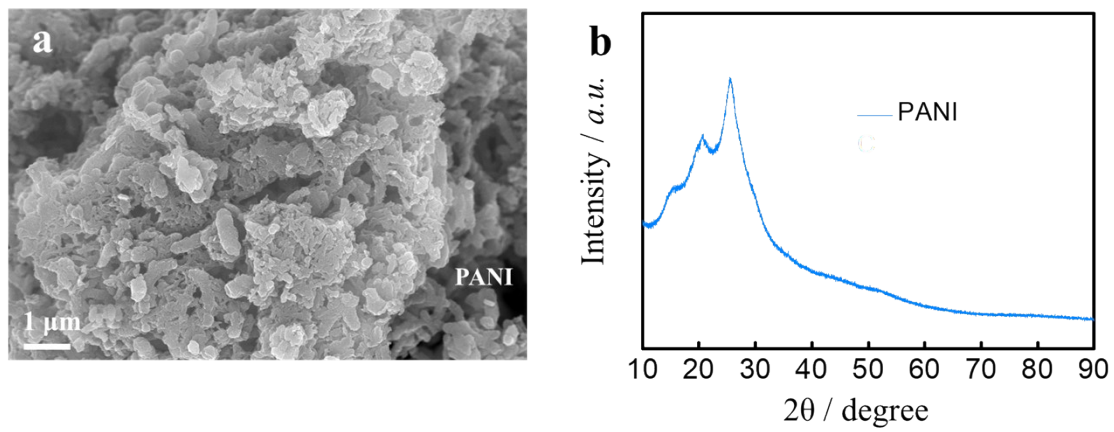

**Fig. S1** (a) SEM image of PANI. (b) XRD pattern of PANI.

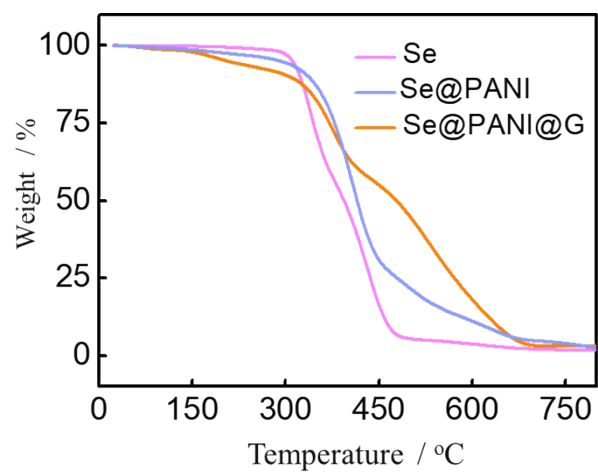

**Fig. S2** TG curves of the as-prepared Se nanowires, Se@PANI, and Se@PANI@G.

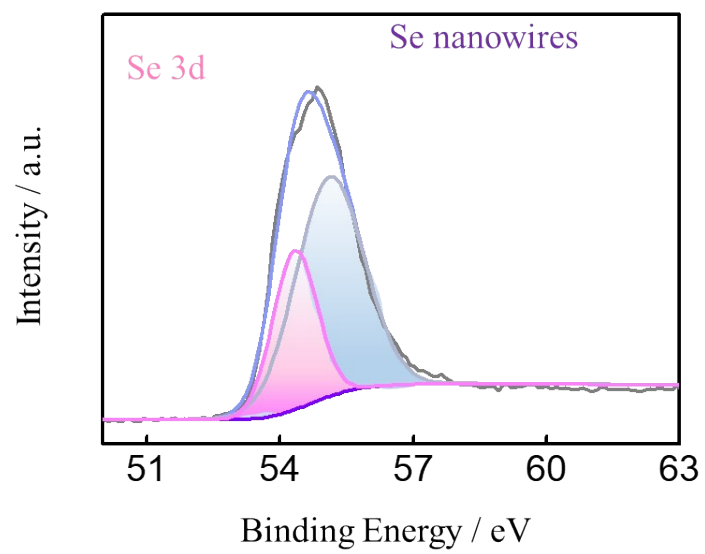

**Fig. S3** Se 3d XPS spectra of as-prepared Se nanowires.

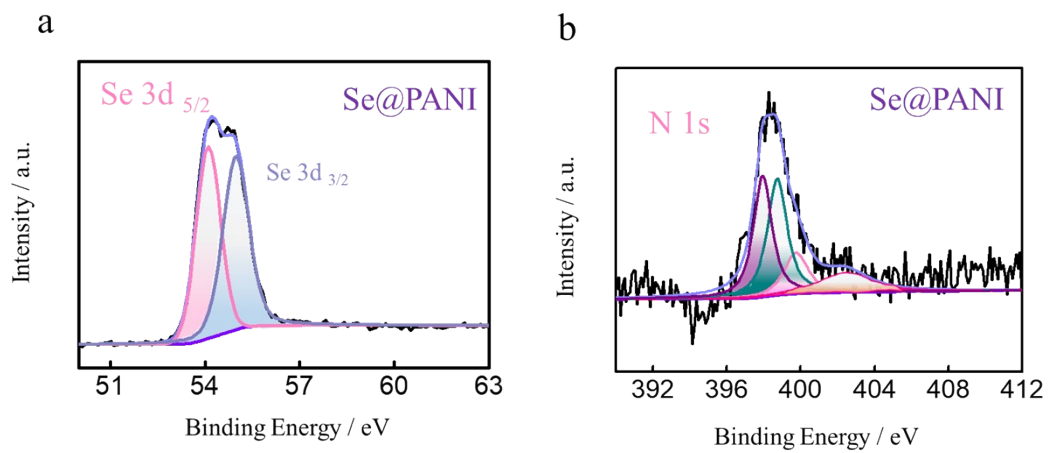

**Fig. S4** (a) Se 3d XPS spectra of as-prepared Se@PANI. (b) N 1s XPS spectra of as-prepared Se@PANI.

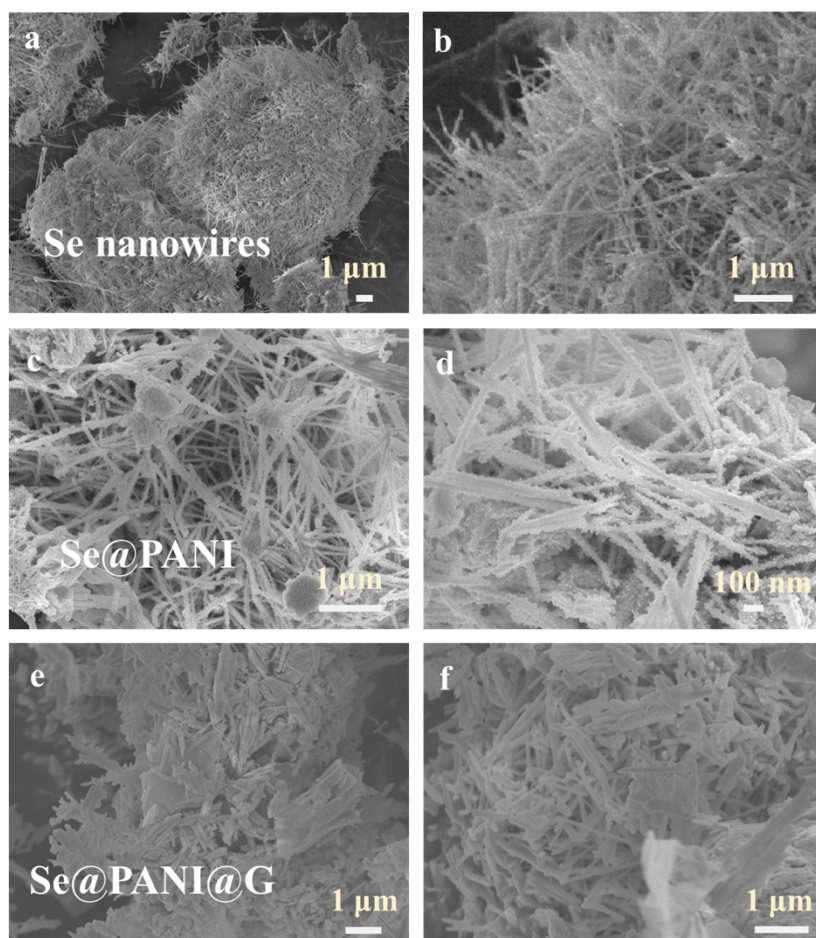

**Fig. S5** (a,b) SEM images of as-prepared Se nanowires. (c,d) SEM images of as-prepared Se@PANI. (e,f) SEM images of as-prepared Se@PANI@G.

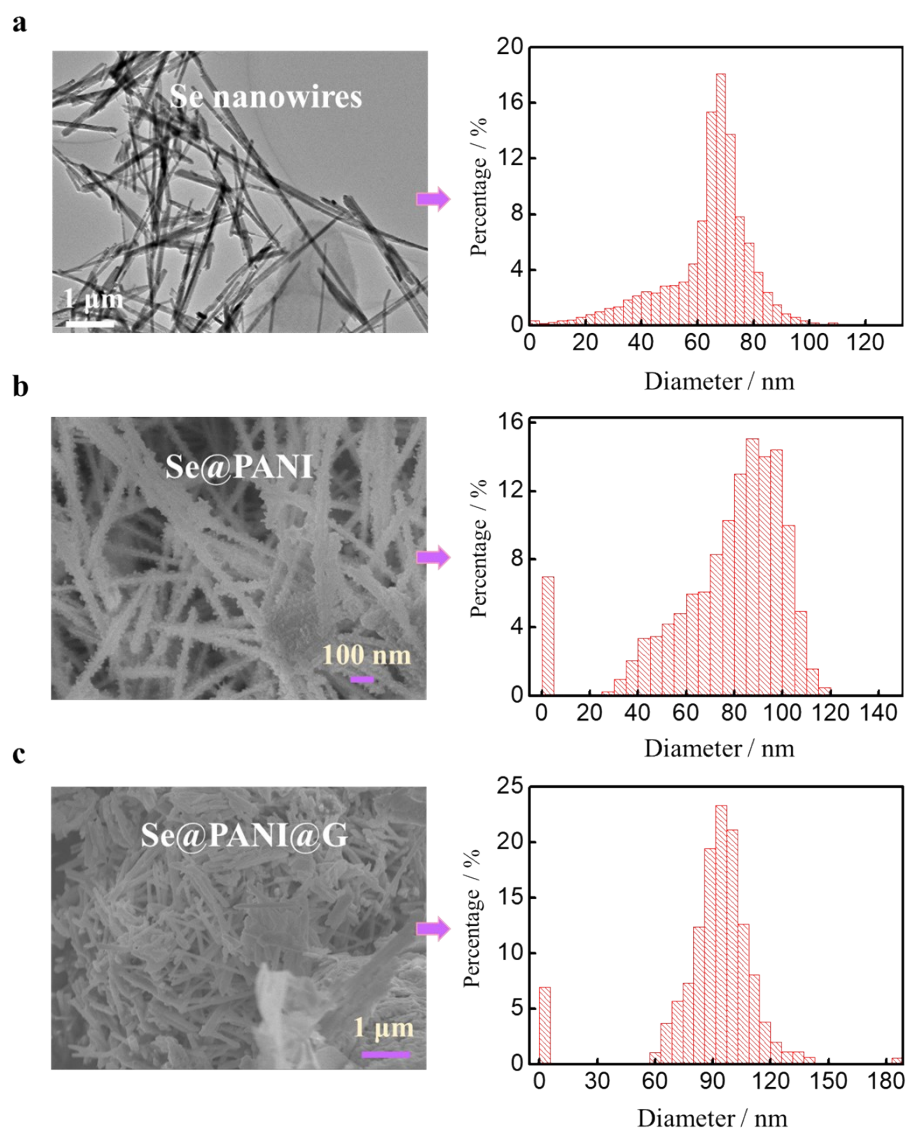

**Fig. S6** (a) SEM images of as-prepared Se nanowires and the corresponding histogram of Se nanowires diameter. (b) SEM images of as-prepared Se@PANI and the corresponding histogram of Se@PANI diameter. (c) SEM images of as-prepared Se@PANI@G and the corresponding histogram of Se@PANI@G diameter.

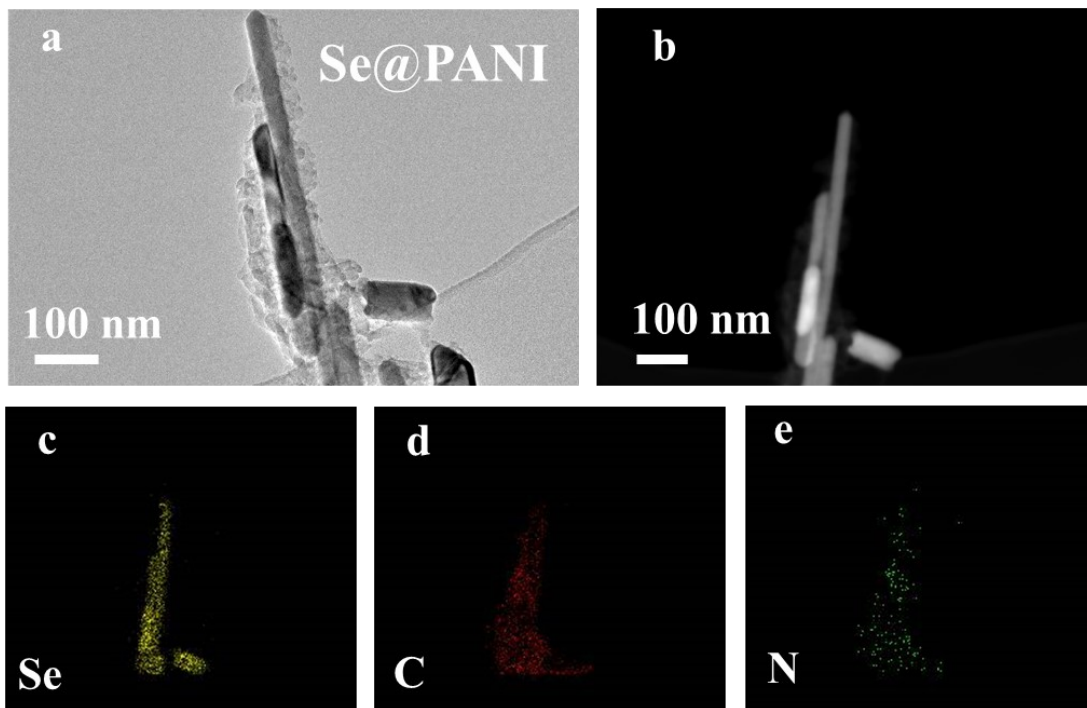

**Fig. S7** (a) TEM images of Se@PANI. (b) HAADF (High-Angle Annular Dark Field)-STEM image of the Se@PANI nanowires. (c-e) The corresponding elemental mapping images.



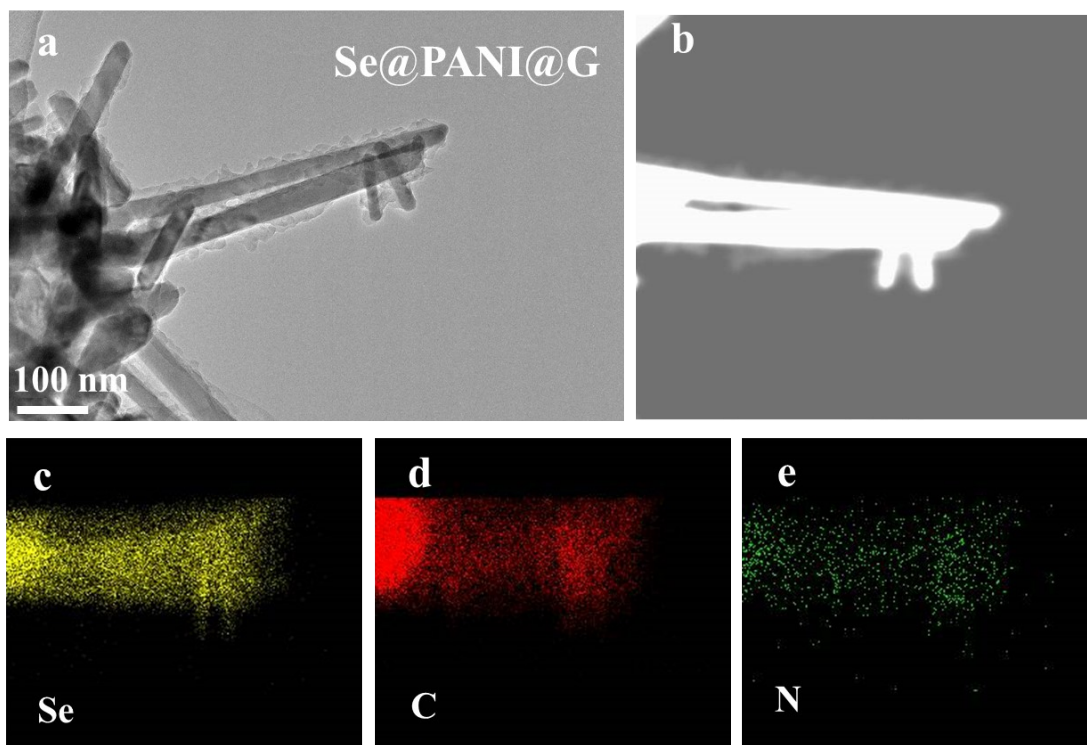

**Fig. S8** (a) TEM images of Se@PANI@G. (b) HAADF-STEM image of the Se@PANI@G nanowires. (c-e) The corresponding elemental mapping images.

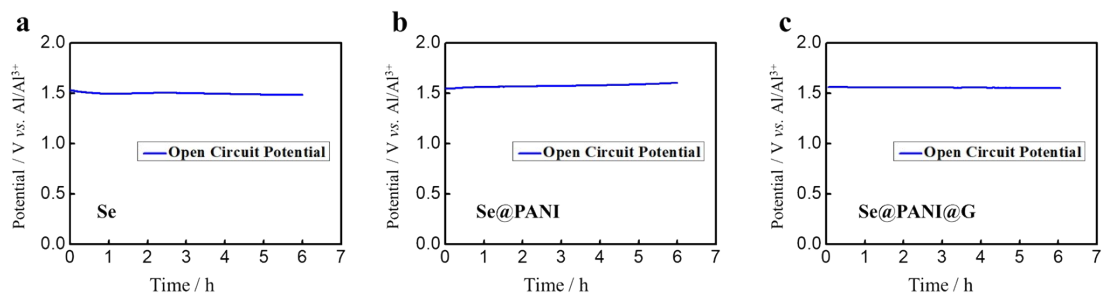

**Fig. S9** (a) The open circuit potential of Al/Se battery before cycling. (b) The open potential of Al/Se@PANI battery before cycling. (c) The open potential of Al/Se@PANI@G battery before cycling.

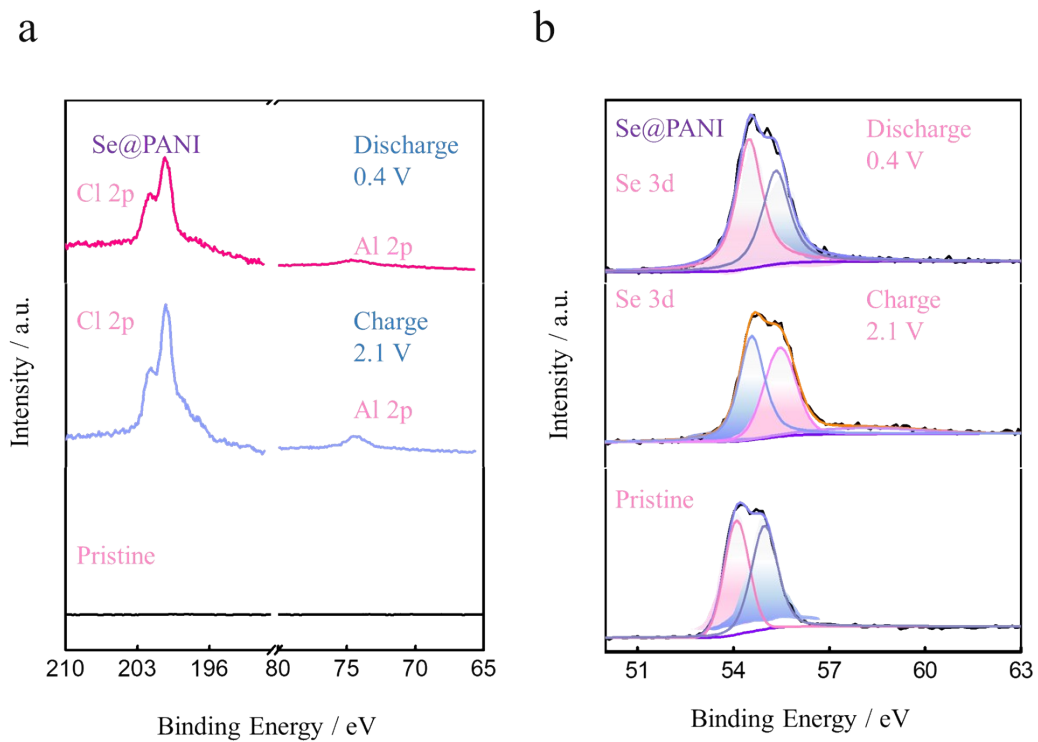

**Fig. S10** (a) Al 2p, Cl 2p, and (b) Se 3d, XPS spectra of Se@PANI electrodes after charging to 2.1 V and discharging to 0.4 V.

$\text{Se}_2\text{Cl}_2$

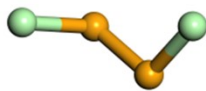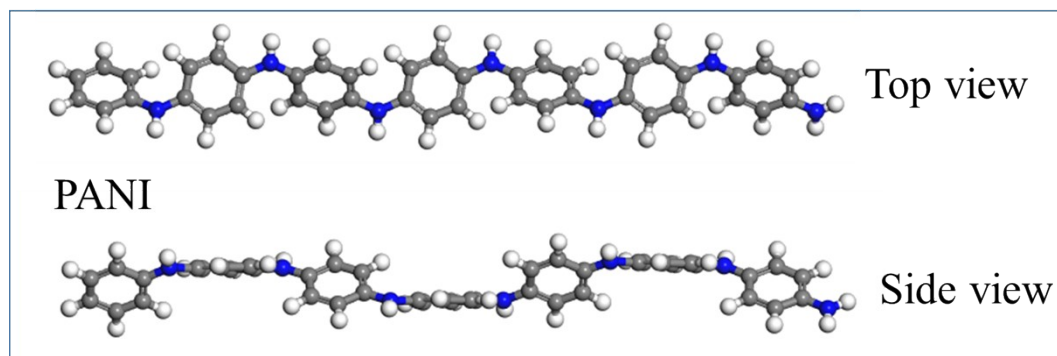

**Fig. S11** The structures of  $\text{Se}_2\text{Cl}_2$  and PANI.

PANI@G

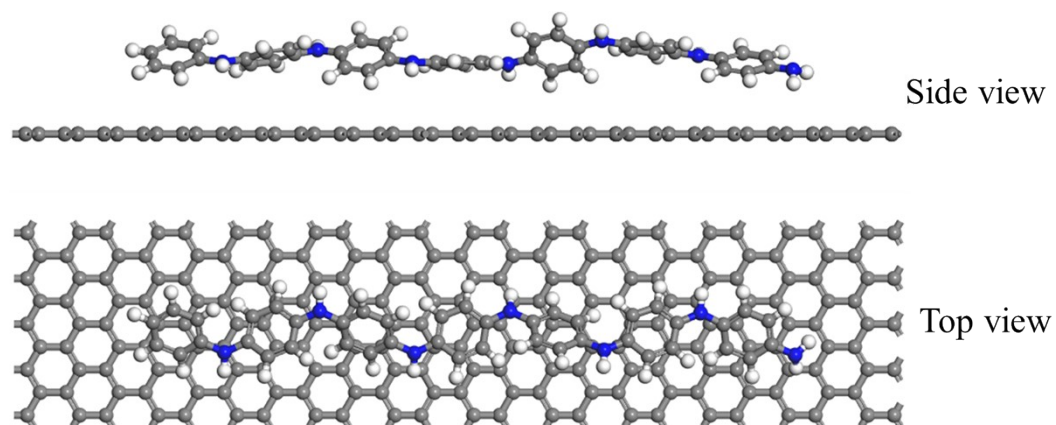

**Fig. S12** The optimized structures of PANI@G.

**Table S1** The total energies of  $\text{Se}_2\text{Cl}_2$ , PANI, PANI@G, PANI@ $\text{Se}_2\text{Cl}_2$ , and PANI@G@ $\text{Se}_2\text{Cl}_2$ .

|                                  | Total energy/eV |
|----------------------------------|-----------------|
| $\text{Se}_2\text{Cl}_2$         | -155720.4302    |
| PANI                             | -54531.86008    |
| PANI@G                           | -236923.1305    |
| PANI@ $\text{Se}_2\text{Cl}_2$   | -210254.4815    |
| PANI@G@ $\text{Se}_2\text{Cl}_2$ | -392647.2731    |

**Table S2** Comparison of electrochemical performances of Se@PANI@G positive electrode with previous Se-based positive electrodes.

| Positive electrode                                                                          | Electrolyte                                            | Separator                                | Voltage range (V) | Discharge capacity (mAh g <sup>-1</sup> ) | Current density (mA g <sup>-1</sup> ) | Cycles |
|---------------------------------------------------------------------------------------------|--------------------------------------------------------|------------------------------------------|-------------------|-------------------------------------------|---------------------------------------|--------|
| Se/graphene aerogel (Se/GA) <sup>[1]</sup>                                                  | AlCl <sub>3</sub> /Et <sub>3</sub> NHCl, 1.5:1 by mole | glass fiber(GF/D)                        | 0.01-2.3          | ~176                                      | 1000                                  | 50     |
| Se/GA <sup>[1]</sup>                                                                        | AlCl <sub>3</sub> /Et <sub>3</sub> NHCl, 1.5:1 by mole | oxidizing CNT (O-CNT) modified separator | 0.01-2.3          | 395                                       | 1000                                  | 200    |
| MCF-7/Se <sup>[2]</sup>                                                                     | EMImCl/AlCl <sub>3</sub> , 1: 1.1 by mole              |                                          | 1.0-2.3           | 152                                       | 500                                   | 2000   |
| TiO <sub>2</sub> @Se-rGO <sup>[3]</sup>                                                     | EMImCl/AlCl <sub>3</sub> , 1: 1.3 by mole              | Whatman glass fiber (GF/C)               | 0.1-2.2           | 225.8                                     | 500                                   | 500    |
| Se <sup>[4]</sup>                                                                           | EMImCl/AlCl <sub>3</sub> , 1: 1.3 by mole              | CMK-3 modified separators                | 0.01-2.4          | 270                                       | 1000                                  | 500    |
| Se nanowires grown directly on a flexible carbon cloth substrate (Se NWs@CC) <sup>[5]</sup> | Thiourea-AlCl <sub>3</sub>                             |                                          | 0.01-1.5          | 195                                       | 100                                   | 100    |
| Se@CMK-3 <sup>[6]</sup>                                                                     | EMImCl/AlCl <sub>3</sub> , 1: 1.3 by mole              | Whatman GF/D                             | 0.05-1.5          | 600                                       | 67.5                                  | 9      |
| one-dimensional hollow Se@C nanotube (Se@CT) <sup>[7]</sup>                                 | EMImCl/AlCl <sub>3</sub> , 1: 1.3 by mole              | Whatman glass fiber (GF/C)               | 0.5-2.3           | 162.9                                     | 500                                   | 200    |
| Se nanowires and mesoporous carbon (Se/CMK-3) <sup>[8]</sup>                                | EMImCl-AlCl <sub>3</sub> , 1:1.1 by mole               | Glass fiber (Filtech)                    | 1.0-2.3           | 124                                       | 200                                   | 50     |
| This work (Se@PANI@G)                                                                       | EMImCl/AlCl <sub>3</sub> , 1: 1.3 by mole              | glass fiber (GF/A)                       | 0.4-2.1           | 164                                       | 200                                   | 160    |

## References

- 1 T. Zhang, T. Cai, W. Xing, T. Li, B. Liang, H. Hu, L. Zhao, X. Li and Z. Yan, *Energy Storage Mater.*, 2021, **41**, 667-676.
- 2 Y. Kong, A. K. Nanjundan, Y. Liu, H. Song, X. Huang and C. Yu, *Small*, 2019, **15**, 1904310.
- 3 Z. Li, X. Wang, X. Li and W. Zhang, *Chem. Eng. J.*, 2020, 400, 126000.
- 4 H. Lei, S. Jiao, J. Tu, W. L. Song, X. Zhang, M. Wang, S. Li, H. Chen and D. Fang, *Chem. Eng. J.*, 2020, **385**, 123452.
- 5 S. C. Wu, Y. Ai, Y. Z.Chen, K. Wang, T. Y. Yang, H. J. Liao, T. Y. Su, S. Y.Tang, C. W. Chen, D. C. Wu, Y. C. Wang, A. Manikandan, Y. C. Shih, L. Lee and Y. L. Chueh, *ACS Appl. Mater. Interfaces*, 2020, **12**, 27064-27073.
- 6 S. Liu, X. Zhang, S. He, Y. Tang, J. Wang, B. Wang, S. Zhao, H. Su, Y. Ren, L. Zhang, J. Huang, H. Yu, K. Amine, *Nano Energy*, 2019, **66**, 104159.
- 7 Z. Li, J. Liu, X. Huo, J. Li and F. Kang, *ACS Appl. Mater. Interfaces*, 2019, **11**, 45709-45716.
- 8 X. Huang, Y. Liu, C. Liu, J. Zhang, O. Noonan and C. Yu, *Chem. Sci.*, 2018, **9**, 5178-5182.
